# Supplementary material
Source: ML conference proceedings conference paper supplement (https://openaccess.thecvf.com/content/CVPR2022/html/Kim_MUM_Mix_Image_CVPR_2022_paper.html)
Supplement: Supplementary file 1 [file Kim_MUM_Mix_Image_CVPR_2022_supplemental.pdf]

# MUM : Mix Image Tiles and UnMix Feature Tiles for Semi-Supervised Object Detection Supplemental Materials

JongMok Kim<sup>1,2</sup> JooYoung Jang<sup>1,2</sup> Seunghyeon Seo<sup>2</sup> Jisoo Jeong<sup>2</sup> Jongkeun Na<sup>1</sup> Nojun Kwak<sup>2</sup>  
<sup>1</sup>SNUAILAB <sup>2</sup>Seoul National University

## A. Training details and stability

In this section, we provide training details of hyperparameters used in our experiments, as show in Table. 2. The most of parameters are from the Unbiased Teacher for the sake of fair comparison. since MUM is easy to add to any framework and prevent losing semantic information, our training process based on the Unbiased Teacher [27] was stable, and the training accuracy curve rose upward with slight variance (see Fig. 1). Thanks to this, we have conducted our experiments with the default hyperparameters in the Unbiased Teacher [27] and could verify that our MUM works well as an add-on to the baseline SSOD work and achieves better performance in fair comparison.

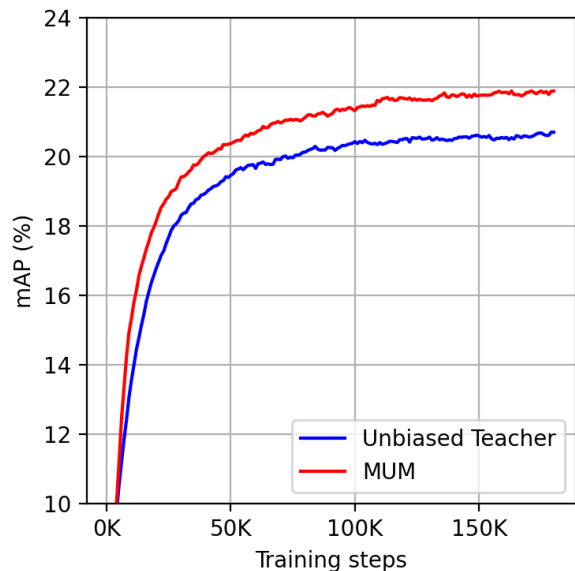

Figure 1. Training curves of the Unbiased Teacher and our MUM. MUM shows a better training curve with no more variance comparing the Unbiased Teacher.

## B. Relation between $N_T$ and foreground-image ratio

The number of tiles ( $N_T$ ) correlates with the foreground-image ratio, because the degree of splitting and occluding the foreground object is simultaneously related to the foreground object size and tile size. In order to further investigate the correlation between foreground-image ratio and  $N_T$ , here we define a new parameter,  $N_O$  as the average number of tiles where a single foreground object lies. The relationship between the gain of mAP and  $N_O$  with various  $N_T$  and object size in the COCO validation dataset is summarized in Table 1 and Fig. 2

We find  $1.2 \leq N_O \leq 2.5$  is an acceptable range for the AP gain. It is reasonable that too small  $N_O$  ( $< 1.2$ ) means that augmentation is not enough, while too large  $N_O$  ( $> 2.5$ ) tells that the foreground object is teared into too many pieces. This explains our choice of the tile size,  $N_T=4$ , was a reasonable. The above experiment implies that  $N_T$  should be adjusted for the image and foreground object’s resolution depending on the  $N_O$  and MUM can be enhanced by sophisticatedly generating the mixing mask.

Table 1. The relationship between  $N_O$  and AP with varying  $N_T$  and object size.

| $N_T$        | $N_O$ / AP / AP gain |                  |                  |
|--------------|----------------------|------------------|------------------|
|              | Small                | Medium           | Large            |
| 1 (baseline) | 1.00/8.93/0          | 1.00/21.85/0     | 1.00/28.07/0     |
| 2            | 1.13/9.33/+0.40      | 1.38/22.93/+1.08 | 2.48/28.60/+0.53 |
| 4            | 1.29/9.86/+0.93      | 1.96/23.66/+1.81 | 6.19/27.91/-0.16 |
| 8            | 1.65/9.72/+0.79      | 3.42/22.33/+0.48 | 17.9/27.12/-0.95 |

Table 2. Hyperparameters for various protocols

| Hyperparameters | Description                          | COCO-Standard | COCO-Additional | VOC12  | VOC12+COCO20cls | Swin  |
|-----------------|--------------------------------------|---------------|-----------------|--------|-----------------|-------|
| $\tau$          | Confidence threshold of pseudo label | 0.7           | 0.7             | 0.7    | 0.7             | 0.7   |
| $\lambda_u$     | Unsupervised loss weight             | 4.0           | 2.0             | 4.0    | 4.0             | 4.0   |
| $\delta$        | EMA decay rate                       | 0.9996        | 0.9996          | 0.9996 | 0.9996          | 0.999 |
| $p$             | Percentage of applying MUM           | 1.0           | 1.0             | 1.0    | 1.0             | 1.0   |
| Optimizer       | Training optimizer                   | SGD           | SGD             | SGD    | SGD             | SGD   |
| LR              | Initial learning rate                | 0.01          | 0.01            | 0.01   | 0.01            | 0.01  |
| Momentum        | SGD momentum                         | 0.9           | 0.9             | 0.9    | 0.9             | 0.9   |
| Weight Decay    | Weight decay                         | 1e-4          | 1e-4            | 1e-4   | 1e-4            | 1e-4  |
| Training Steps  | Total training steps                 | 180K          | 360K            | 45K    | 90K             | 60K   |
| Batch Size      | Batch size                           | 32            | 32              | 32     | 32              | 16    |

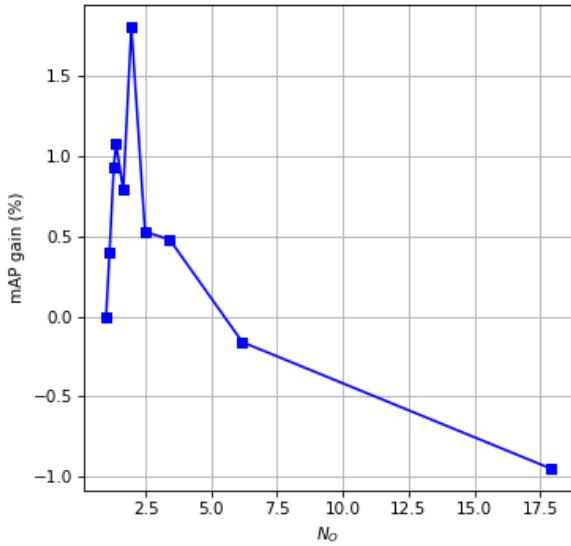

Figure 2.  $N_T$  vs. gain of mAP in the COCO validation dataset
